# Supplementary material
Source: publisher figshare collection journal article supplement (https://gsapubs.figshare.com/ndownloader/files/24960107)
Supplement: Supplementary file 1 [file 24960107]

## Sheet: Sheet1
VARVE THICKNESS DATA
Data for Rittenhouse sites taken from Plate I, Rittenhouse, G., 1933. A study of varved clays of northwestern Ontario. Master’s thesis (Univ. of Chicago). 29 pgs
Accompanying Data and Methods
1:5 scale cores images with line measurements, from which these varve thickness data are taken using ArcGIS, are publicly accessible at: https://osf.io/j485c/ (DOI: 10.17605/OSF.IO/J485C). The line measurements (visbile in the images) were completed by A. Breckenridge using the processed described in Breckenridge et al. (2012). Taking multiple measurements from the same varve has little impact on…
Varve Sedimentology
The archived core images are useful for assessing the annual nature of the varves. The varves are similar in appearance to those described from the Baltic Ice Lake, Lake Minong, and Lake Hitchcock (Ashley, 1975; Ringberg and Elström, 1999; Ridge et al., 2012). The oldest varves are generally thickest, with thicker, coarser-grained summer layers typically composed of multiple, graded laminae with …
Thickness Correlations
There has been less focus on assessing the annual nature of rhythmites by assessing the thickness correlation (rather than sedimentology), but this is where we have the greatest confidence in the annual nature of this record. The Wabigoon sub-basin from which these varves derive, is composed of many smaller sub-basins, and spans a large area (100's of km2), and yet the relative changes in varve t…
Works Cited Above
Ashley, G.M., 1975. Rhythmic sedimentation in glacial Lake Hitchcock, Massachusetts, Connecticut. In: Jopling, A.V., McDonald, B.C. (Eds.), 1975. Glacioﬂuvial and Glaciolacustrine Sedimentation, vol. 23. Society of Economic Palaeontologists and Mineralogists, pp. 304-320. Special Publication. Breckenridge, A., Lowell, T.C., and Evans, G., 2012, A review and analysis of varve thickness records fro…
Varve Site	Lat	Long
MNI	49.441	-92.711
DIN	49.22	-92.553
WAB	49.684	-92.815
GHO	49.845	-92.659
GOD	49.602	-92.753
EAG	48.8037	-93.517
Varve thickness data in centimenters.
Age is based on assigning an age of 11,490 cal yr BP for the onset of the red varves (varve =1). This date is from the four, 14C-dated macrofossils from Perch Lake.
									Rittenhouse (1933) Sites
cal yr BP	Varve Number	MNI	DIN	WAB	GHO	GOD	EAG		Dryden	Dinorwic	Stanawan	R14
12231	-740										2.21154
12230	-739										0.81952
12229	-738										0.70784
12228	-737										1.01952
12227	-736										1.00928
12226	-735
12225	-734
12224	-733
12223	-732
12222	-731
12221	-730
12220	-729
12219	-728
12218	-727
12217	-726										1.92032
12216	-725										1.44928
12215	-724										2.66848
12214	-723										2.3504
12213	-722										1.95072
12212	-721										1.3104
12211	-720										0.545291
12210	-719										0.752
12209	-718										0.58912
12208	-717										0.91104
12207	-716										0.78912
12206	-715										0.664
12205	-714										0.9616
12204	-713										2.0592
12203	-712										0.50464
12202	-711										0.61984
12201	-710										0.65696
12200	-709										0.5824
12199	-708										0.48768
12198	-707										0.74848
12197	-706										1.12416
12196	-705										0.62304
12195	-704										1.02624
12194	-703										0.91424
12193	-702										0.79936
12192	-701										0.47744
12191	-700										0.61984
12190	-699										0.54848
12189	-698										0.96512
12188	-697										1.71392
12187	-696										0.81632
12186	-695										1.11776
12185	-694										1.1008
12184	-693										0.66048
12183	-692										0.97184
12182	-691										0.91456
12181	-690										1.0432
12180	-689										1.53408
12179	-688										0.6704
12178	-687										0.71456
12177	-686										1.37152
12176	-685										0.82304
12175	-684										0.67392
12174	-683										0.5824
12173	-682										1.03616
12172	-681										0.88416
12171	-680										1.18528
12170	-679										1.5072
12169	-678										1.01952
12168	-677										0.59936
12167	-676										0.80288
12166	-675										0.91776
12165	-674										1.01248
12164	-673										0.99232
12163	-672										1.41216
12162	-671			27.4528							0.88736
12161	-670			11.9065							0.6368
12160	-669			16.1827							0.5216
12159	-668			1.65118							0.6976
12158	-667			0.944564							0.62656
12157	-666			3.16756							0.99904
12156	-665			1.70673							0.4944
12155	-664			1.2701							0.84672
12154	-663			1.26209							0.44384
12153	-662			1.06375							0.576
12152	-661			0.889073							0.3216
12151	-660			0.991427							0.35904
12150	-659			0.944564							0.94496
12149	-658			0.873271							0.89056
12148	-657			0.889321							1.51712
12147	-656			0.688204							0.61312
12146	-655			0.873127							0.44032
12145	-654			0.773038							0.58912
12144	-653			1.49814							0.54208
12143	-652			0.900145							0.83648
12142	-651			1.30885							0.74848
12141	-650			1.70459							0.31488
12140	-649			0.984608							0.58592
12139	-648			1.28641							0.34208
12138	-647			0.524837							0.59584
12137	-646			0.48856							0.46752
12136	-645			0.853366							0.44352
12135	-644			0.496158							0.58912
12134	-643			0.448751							0.55552
12133	-642			0.734906							0.7008
12132	-641			0.473348							0.41984
12131	-640			0.424824							0.50464
12130	-639			0.392987							0.53824
12129	-638			0.595525							1.11776
12128	-637			0.448751							0.6368
12127	-636			0.587591							0.54176
12126	-635			0.392927							0.77568
12125	-634										0.40288
12124	-633			0.483047							0.45728
12123	-632			0.363803							0.33536
12122	-631			0.609118							0.464
12121	-630			0.297657							0.79232
12120	-629			0.40349							0.82272
12119	-628			0.535782							0.8736
12118	-627			0.707885							0.9312
12117	-626			0.650898							1.2192
12116	-625			1.05839							0.61312
12115	-624			0.439209							1.19872
12114	-623			0.370417							0.65344
12113	-622			0.518584							0.68416
12112	-621			0.523876							0.77536
12111	-620			0.9631							0.50144
12110	-619			0.685277							0.61984
12109	-618			0.722314							0.49792
12108	-617			0.574153							0.40992
12107	-616			0.769944							0.57248
12106	-615			0.7706							0.44032
12105	-614			0.336032							0.63328
12104	-613			0.719668							0.53536
12103	-612			0.80368							0.92768
12102	-611			0.717691							1.33088
12101	-610			0.866537							0.60608
12100	-609			1.42545							0.47744
12099	-608			0.777215							0.59616
12098	-607			0.714376							0.6944
12097	-606			0.554925							0.728
12096	-605			0.797066							0.48448
12095	-604			0.992197							0.61984
12094	-603			1.48432							0.77216
12093	-602			0.846675							0.76192
12092	-601			0.945887							0.53856
12091	-600			0.694544							0.67072
12090	-599			1.22238							0.40992
12089	-598			0.532485							0.70752
12088	-597			0.406798							0.6704
12087	-596			0.522553							0.6672
12086	-595			0.396931							0.52512
12085	-594			0.515954							0.76864
12084	-593			0.598658							0.83296
12083	-592			1.05842							0.96544
12082	-591			0.961762							0.70112
12081	-590			0.735548							0.67392
12080	-589			0.482877							0.48416
12079	-588			0.509324							0.64
12078	-587			0.410105							0.65024
12077	-586			0.412751							0.9888
12076	-585			0.484188							0.6096
12075	-584			0.704486							0.47744
12074	-583			0.714376							0.53856
12073	-582			0.615166							0.68736
12072	-581			0.764015							0.52832
12071	-580			0.529168							0.4672
12070	-579			0.767293							0.53152
12069	-578			0.94721							0.52832
12068	-577			1.16946							0.78912
12067	-576			0.878418							0.44704
12066	-575			0.931335							0.4672
12065	-574			1.20121							0.75552
12064	-573			1.14829							0.47744
12063	-572			0.734287							0.48096
12062	-571			0.926044							0.72448
12061	-570			0.686596							0.4784
12060	-569			0.719668							0.61408
12059	-568			0.836152							0.73792
12058	-567			0.545043							0.42496
12057	-566			1.07421							0.63808
12056	-565			1.05835							0.35552
12055	-564			0.904877							0.54464
12054	-563			0.62444							0.50784
12053	-562			0.534459							0.51072
12052	-561			1.02659							0.64224
12051	-560			0.78846							0.63488
12050	-559			0.69323							0.48
12049	-558			0.777877							0.315843
12048	-557			1.15888							0.3712
12047	-556			0.640293							0.5024
12046	-555			0.624418							0.317764
12045	-554			0.793752							0.39232
12044	-553			0.671414							0.46272
12043	-552			1.24361							0.57568
12042	-551			0.628395							0.4176
12041	-550			0.682626							0.4304
12040	-549			0.714376							0.35008
12039	-548			0.843873							0.36832
12038	-547			0.782445							0.44448
12037	-546			0.795068							0.3456
12036	-545			0.178991							0.51808
12035	-544			0.5553							0.5264
12034	-543			0.489811							0.3456
12033	-542			0.575801							0.6096
12032	-541			0.476649							0.31904
12031	-540			1.03519							0.37344
12030	-539			0.764318							0.63392
12029	-538		2.55598	1.13837							0.63264
12028	-537		1.57785	0.743481							0.59296
12027	-536		1.72658	0.537105							0.584
12026	-535		1.25258	0.733904							0.39552
12025	-534		1.23296	0.863869							0.40128
12024	-533		1.28238	0.937619							0.39584
12023	-532		1.45971	0.885044							0.37984
12022	-531		1.50119	1.02593							0.53024
12021	-530		1.03474	0.91647							0.59136
12020	-529		1.07436	0.597298							0.39392
12019	-528		1.36333	0.843365							0.44864
12018	-527		1.46929	0.79776							0.52384
12017	-526		0.985774	0.658814							0.72608
12016	-525		0.690583	0.599282							0.5184
12015	-524		0.851356	0.646908							0.4032
12014	-523		1.79979	1.21445							0.4064
12013	-522		1.62719	1.09543							0.66272
12012	-521		2.29042	1.11659							0.6784
12011	-520		3.20877	1.30705							0.6784
12010	-519		1.24367	0.693391							1.1696
12009	-518		1.60252	0.957808							0.5664
12008	-517		2.05146	1.06892							0.776
12007	-516		2.7036	1.0901							0.63392
12006	-515		1.44496	0.941919							0.6416
12005	-514		1.93626	0.878434							0.45952
12004	-513		0.809471	0.523876							0.46368
12003	-512		1.24386	1.00542							0.34304
12002	-511		1.16448	0.825502							0.55232
12001	-510		1.71099	1.143							0.48768
12000	-509		3.36625	1.28589							0.66432
11999	-508		1.31072	1.19063							0.73504
11998	-507		0.951344	0.672126							0.35552
11997	-506		2.51741	0.928697							0.46368
11996	-505			1.41288							1.34464
11995	-504		1.46308	0.889002							0.51232
11994	-503		1.92632	0.984259							0.47648
11993	-502		2.44104	0.857259							0.46464
11992	-501		1.25632	0.715038							0.384
11991	-500		1.03694	0.783178							0.3536
11990	-499		0.905444	0.574171							0.256
11989	-498		1.10288	0.828181							0.39136
11988	-497		0.868018	0.566209							0.31776
11987	-496		0.761145	0.656168							0.3088
11986	-495		1.27326	0.793752							0.41696
11985	-494		1.68225	1.12713							0.5376
11984	-493		1.67056	0.857268							0.44864
11983	-492		1.49645	1.0266							0.56064
11982	-491		0.773979	0.410105							0.3536
11981	-490		0.731803	0.506027							0.27104
11980	-489		1.72454	0.940596							0.51424
11979	-488			0.857252							0.4
11978	-487			0.720991							0.52064
11977	-486			0.57547							0.44864
11976	-485			0.662783							0.51008
11975	-484			0.885033							0.63936
11974	-483			1.11522							0.87648
11973	-482		1.397	1.09935							0.74944
11972	-481		1.03188	0.662783							0.43392
11971	-480		2.00032	1.3044							0.63712
11970	-479		1.60867	0.803673							0.48896
11969	-478		1.8865	1.05706							0.60768
11968	-477		1.01338	0.717746							0.38336
11967	-476		0.994864	0.555287							0.24992
11966	-475		1.24377	0.768616							0.32608
11965	-474		1.05311	0.570178							0.39168
11964	-473		0.91549	0.450454							0.25824
11963	-472		0.867909	0.629048							0.34912
11962	-471		1.05836	0.623756							0.38112
11961	-470		0.788825	0.582084							0.40192
11960	-469		2.16435	1.14366							0.6816
11959	-468		1.34938	0.849376						1.36416	0.50592
11958	-467		1.41817	0.954536						1.17504	0.48256
11957	-466		1.56641	1.05719						1.54432	0.4064
11956	-465		0.791141	0.451777						1.04992	0.34528
11955	-464		1.16681	0.689241						0.80576	0.3344
11954	-463		0.878487	0.695194						0.77216	0.37248
11953	-462		1.23563	0.79772						0.4672	0.35136
11952	-461		1.27002	0.785814						0.65696	0.36416
11951	-460		1.04381	0.599282						0.45728	0.36576
11950	-459		1.28192	0.769939						0.8128	0.40384
11949	-458		1.28992	0.654845						0.626568	0.36192
11948	-457		1.2849	0.76597						0.82304	0.4064
11947	-456		1.44465	0.900908						0.86336	0.47744
11946	-455		1.7079	0.960439						0.91104	0.46592
11945	-454		1.31501	0.817564						0.71456	0.37568
11944	-453		1.12724	0.785814						0.552	0.34048
11943	-452		1.46447	0.956471						0.85696	0.45856
11942	-451		1.4501	0.849314						0.79264	0.44096
11941	-450		1.55576	0.892971						1.13792	0.5792
11940	-449		1.1245	0.825502						0.72832	0.37472
11939	-448		1.22636	0.873127						0.74176	0.45088
11938	-447		1.85474	1.0676						1.29696	0.61984
11937	-446		1.95132	1.17078						1.0464	0.64512
11936	-445		1.05701	0.86122						0.8432	0.39008
11935	-444		1.20786	0.821533						0.8672	0.37728
11934	-443		1.62065	1.05569					1.73056	1.01248	0.4928
11933	-442		1.18807	0.742158					1.10464	0.6672	0.39744
11932	-441		1.33616	0.79772					1.17152	1.25664	0.5056
11931	-440		1.62328	1.03188					2.0384	1.04672	0.49792
11930	-439		1.47116	0.964408					0.96416	1.25984	0.55264
11929	-438		2.0096	1.03717					1.49632	1.60864	0.50432
11928	-437		1.40763	0.783168					1.04096	0.88736	0.47872
11927	-436		2.27564	0.936627					1.5232	1.20896	0.63392
11926	-435		1.37685	0.994835					2.01856	1.0768	0.48384
11925	-434		0.875015	0.635001					1.8176	0.74848	0.35808
11924	-433		1.1433	0.740835					1.53632	0.54176	0.34944
11923	-432		1.70138	1.19063					0.88032	0.50464	0.61472
11922	-431		1.10933	0.809627					1.66368	0.90784	0.43072
11921	-430		1.01118	0.613835					0.95712	0.82304	0.4256
11920	-429		1.50955	0.894293					1.04768	1.1616	0.51936
11919	-428		1.79997	1.04775					1.33536	1.23296	0.61344
11918	-427		1.34756	0.94721					1.58976	1.0736	0.43808
11917	-426		1.24151	0.719668					1.84768	0.76864	0.50176
11916	-425		0.937169	0.526522					1.51296	0.63328	0.38752
11915	-424		1.22267	0.764647					1.49632	0.82304	0.4928
11914	-423		1.18098	0.685272					0.65248	0.6096	0.46592
11913	-422		1.49888	0.836085					0.62912	0.91776	0.35296
11912	-421		1.10083	0.662783					0.6528	0.73824	0.37088
11911	-420		0.674987	0.529168					1.97824	0.56896	0.2656
11910	-419		1.26762	0.72496					0.90048	0.904	0.36192
11909	-418		1.43904	0.735543					0.99392	0.928	0.48768
11908	-417		0.479053	0.343959					0.41152	0.43712	0.50944
11907	-416		0.584434	0.354542					0.29792	0.464
11906	-415		1.28754	0.793769					0.89376	1.00224	0.53728
11905	-414		1.1699	0.62971					0.77632	0.99904	0.5056
11904	-413		1.39592	0.624418					0.4016	0.89056	0.456
11903	-412		2.61925	1.11126					2.0384	1.68992	0.7584
11902	-411		3.2152	1.14829					2.13216	1.85568	0.936
11901	-410		0.930824	0.386292					0.328	0.64704	0.29216
11900	-409		1.01044	0.433918					0.3312	0.6096	0.2592
11899	-408		1.50842	0.767293					0.92384	0.9552	0.38368
11898	-407		1.40609	0.83081					0.63328	1.55456	0.23872
11897	-406		1.45412	0.69321					0.51616	1.21248	0.25792
11896	-405		1.31657	0.772585					0.98304	1.5648	0.24128
11895	-404		1.10672	0.62971					0.7424	1.22592	0.38976
11894	-403		0.67593	0.481543					0.44224	0.67424	0.272
11893	-402		0.653767	0.433918					0.33536	0.64	0.26784
11892	-401		0.813629	0.412751					0.37856	0.61984	0.27328
11891	-400		1.63172	0.82021					0.79168	1.07712	0.26912
11890	-399		1.5873	0.931335					1.56736	0.99232	0.48
11889	-398		1.40128	0.75671					0.85568	0.90432	0.40768
11888	-397		0.920293	0.486834					0.53056	0.83648	0.36704
11887	-396		1.70682	0.894293					1.46464	1.68992	0.34912
11886	-395		1.4065	0.730251					1.16416	0.85696
11885	-394		1.01038	0.592691					0.69088	0.89408	0.40384
11884	-393		1.48148	0.735543					0.368	0.4304	0.33792
11883	-392		0.697919	0.476251					0.36608	0.73152	0.30336
11882	-391		0.982878	0.582084					1.17824	0.99232	0.34688
11881	-390		1.24738	0.75671					0.93792	0.93792	0.216
11880	-389		1.61059	0.75671					0.38656	0.5792
11879	-388		0.976962	0.497418					0.45056	0.5184	0.13312
11878	-387		0.772534	0.502709					0.82272	0.93824	0.38976
11877	-386		1.72778	0.825511					0.5552	0.6368	0.39232
11876	-385		1.18506	0.685272					0.59872	0.85664	0.46592
11875	-384		1.06756	0.746126					1.04896	0.97536	0.40288
11874	-383		1.76531	0.989551					0.6336	0.64352	0.30464
11873	-382		1.33633	0.635001					0.70528	0.752	0.37344
11872	-381		1.22279	0.682626					0.58624	0.69088	0.32
11871	-380		1.12386	0.642939					0.91296	0.89408	0.36832
11870	-379		1.54605	0.949856					0.66624	0.59616	0.49536
11869	-378		0.931079	0.611189					0.55552	0.56224	0.34144
11868	-377		1.01772	0.703793					0.75264	0.79584	0.30624
11867	-376		1.37378	0.759356					0.76288	0.74496	0.3024
11866	-375		1.1631	0.698521					1.63104	1.25312	0.4752
11865	-374		2.53001	1.16682					0.5184	0.71808	0.57792
11864	-373		1.09824	0.653522					0.56352	0.69088	0.25152
11863	-372		1.17614	0.62971					0.5408	0.83648	0.24
11862	-371		1.0312	0.666751					0.41952	0.80928	0.27808
11861	-370		1.17549	0.698501					0.6416	1.28352	0.19808
11860	-369		2.03577	0.769948					0.76096	1.12096	0.14848
11859	-368		1.61915	0.952502					0.79616	0.928	0.27552
11858	-367		1.23013	0.72496					0.61696	1.19552	0.49536
11857	-366		1.575	0.846668					0.54528	1.10082	0.42304
11856	-365		1.64644	0.711731					0.79808	0.87712	0.34304
11855	-364		1.10089	0.632355					0.50304	0.7856	0.46496
11854	-363		1.28674	0.642939					0.55392	0.7824	0.35168
11853	-362		0.967205	0.59796					0.4624	0.589478	0.29088
11852	-361		1.34525	0.592668					0.54368	1.0432	0.29056
11851	-360		0.806788	0.627064					0.49792	0.7824	0.288
11850	-359		1.2583	0.714376					0.67584	0.97888	0.39104
11849	-358		1.01939	0.777877					0.5184	0.71808	0.26784
11848	-357		1.01089	0.767293					0.69856	0.81952	0.25792
11847	-356		1.18139	0.69321					0.67552	0.66368	0.2592
11846	-355		1.34982	0.825502					0.68864	0.9008	0.2144
11845	-354		1.20269	0.719668					0.56896	0.70432	0.35936
11844	-353		1.18978	0.751418					0.70112	0.8128	0.33024
11843	-352		0.877084	0.460376					0.42432	0.52832	0.22464
11842	-351		0.786985	0.455084					0.71904	0.5248	0.2208
11841	-350		0.5544	0.455084					0.35552	0.39616	0.31744
11840	-349		0.715189	0.439871					0.38112	0.41632	0.23616
11839	-348		1.3405	0.795089					0.6352	1.09056	0.20576
11838	-347		0.654012	0.533996					0.4064	0.338575	0.29728
11837	-346		1.02751	0.76537					1.072	0.62144	0.20448
11836	-345		1.02432	0.645585					0.83072	0.62656	0.27936
11835	-344		0.938797	0.66146					0.56416	0.61472	0.28448
11834	-343		0.9363	0.502709					0.5232	0.61632	0.29728
11833	-342		0.758745	0.513293					0.45472	0.50624	0.25664
11832	-341		0.641179	0.455084					0.3376	0.45216	0.23872
11831	-340		0.822597	0.470959					0.35072	0.51808	0.3328
11830	-339		0.920528	0.560918					0.56384	0.66048	0.3392
11829	-338		1.28811	0.66146					0.4448	0.9008	0.29728
11828	-337		0.783103	0.439209					0.31264	0.47744
11827	-336		0.907025	0.555626					0.5232	0.4672
11826	-335		0.875609	0.608543					0.61184	0.59424
11825	-334		0.749926	0.449793					0.44704	0.5824
11824	-333		1.24403	0.66146					0.5792	0.7808
11823	-332		1.08695	0.777895					0.65536	0.79776
11822	-331		1.52782	0.804335					0.46976	1.09216
11821	-330		1.28687	0.62971					0.68608	0.8688
11820	-329		1.06866	0.587376					0.67552	0.90912
11819	-328		1.5582	0.836085					0.6784	1.248
11818	-327		0.882489	0.719668					0.56896	0.65536
11817	-326		0.496065	0.460376					0.28704	0.42336
11816	-325			0.619126					0.58656	0.70784
11815	-324			0.555651					0.66048	0.65728
11814	-323			1.27					0.65792	0.6384
11813	-322		1.27494	0.59796					0.66784	0.69952
11812	-321		1.33862	0.709085					0.60448	0.71776
11811	-320		0.916779	0.592668					0.492807	0.752
11810	-319		0.955956	0.624418					0.58432	0.62304
11809	-318		0.843581	0.550334					0.52832	0.59584
11808	-317		1.13943	0.703793					0.47776	0.6096
11807	-316		1.00093	0.560918					0.68608	0.61472
11806	-315		1.34112	0.746126					0.45984	0.56384
11805	-314		1.70871	0.751418					0.6224	0.76192
11804	-313		0.878305	0.635001					0.52064	1.26816
11803	-312		1.36539	0.62971					0.36576	0.72384
11802	-311		1.85645	0.873127					0.52064	0.89952
11801	-310		0.901156	0.550334					0.6784	1.016
11800	-309		1.49805	0.82021					0.47488	0.82336
11799	-308		0.885425	0.635001					0.66048	0.95872
11798	-307		1.362	0.783168					0.4528	0.7536
11797	-306		1.21688	0.846668					0.59968	1.03936
11796	-305		1.32787	0.82021					0.5888	0.80032
11795	-304		0.913943	0.682626					0.90528	0.937603
11794	-303		0.609055	0.735543					0.4672	0.616
11793	-302		1.06969	0.656168					0.23328	0.52064
11792	-301		0.886351	0.439209					0.52736	0.71968
11791	-300		0.560377						0.40352	0.57152
11790	-299		1.27567	0.6033					0.30048	0.57792
11789	-298		0.878161	0.513293					0.55424	0.87008
11788	-297		0.997894	0.706446					0.4144	0.59264
11787	-296		0.67103	0.482231					0.71008	0.53568
11786	-295		0.480032	0.398199					0.4896	0.49536
11785	-294		0.97535	0.505588					0.4096	0.65184
11784	-293		1.12359	0.636324					0.52128	0.6496
11783	-292		0.961023	0.624418					0.51136	0.63712
11782	-291		1.60728	0.685549					0.71872	1.0096
11781	-290		1.11144	0.574843					0.488	0.64352
11780	-289		0.88964	0.58012					0.54336	0.472
11779	-288		1.05672	0.585274					0.54848	0.58848
11778	-287		1.84264	0.87924					0.55136	1.16832
11777	-286		0.584808	0.434606					0.38816	0.414726
11776	-285		0.844133	0.644923					0.54816	0.43616
11775	-284		1.0621	0.728038					0.49536	0.88288
11774	-283		1.98898	0.874456					0.75488	1.26592
11773	-282		1.2	0.643547					0.46048	0.7536
11772	-281		0.699648	0.527829					0.44128	0.55232
11771	-280		0.872726	0.693534					0.43488	0.53344
11770	-279		0.937034	0.601073					0.53664	0.59488
11769	-278		1.24846	0.683794					0.54816	0.91232
11768	-277		0.937688	0.596349					0.42976	0.504
11767	-276		0.863249	0.52755					0.38624	0.50144
11766	-275		0.859898	0.572198					0.22848	0.63104
11765	-274		0.795953	0.640643					0.50464	0.47648
11764	-273		0.872726	0.703813					0.4624	0.61408
11763	-272		1.44386	0.656509					0.51008	0.96928
11762	-271		1.21687	0.910553					0.64992	0.818883
11761	-270		0.699648	0.592668					0.36096	0.80864
11760	-269		0.368997	0.381001					0.2944	0.44224
11759	-268		0.365901	0.534486					0.3216	0.65632
11758	-267		0.895393	0.619217					0.53344	0.53952
11757	-266		0.78933	0.545068					0.41152	0.79808
11756	-265		1.18569	0.703873					0.61824	0.59904
11755	-264		0.799245	0.539777					0.40224	0.34944
11754	-263		0.348006	0.42892					0.3184	0.42944
11753	-262		0.617677	0.402202					0.29408	0.45728
11752	-261		0.721931	0.687938					0.3504	0.31328
11751	-260		0.598977	0.539777					0.35136	0.49728
11750	-259		0.539647	0.539777					0.60928	1.18752
11749	-258		2.16122	1.03222					0.91328	0.4592
11748	-257		0.587174	0.566308					0.59808	0.288
11747	-256		0.462076	0.481572					0.4688	0.61408
11746	-255		0.898417	0.571501					0.41536	0.584
11745	-254		1.0814	0.666772					0.50176	0.58624
11744	-253		0.9631	0.693714					0.56128	0.84672
11743	-252		1.42145	0.470989					0.41792	0.38304
11742	-251		0.609836	0.592762					0.30112	0.41696
11741	-250		0.516617	0.598334					0.28832	0.42944
11740	-249		0.985908	0.582109					0.31232	0.42976
11739	-248		1.15723	0.810059					0.50304	0.70688
11738	-247		0.578617	0.444784					0.2768	0.44672
11737	-246		0.555311	0.322966					0.19552	0.26016
11736	-245		0.363261	0.291235					0.17408	0.25216
11735	-244		0.295814	0.312254					0.17024	0.31968
11734	-243		0.420097	0.412886					0.24384	0.32608
11733	-242		1.75387	0.703873					0.73792	1.0496
11732	-241		1.51346	0.846685					0.58176	1.06048
11731	-240		0.423334	0.566605					0.42656	0.9504
11730	-239		2.50826	0.920995					0.95104	1.18528
11729	-238		1.35483	0.864505					0.73408	1.14304
11728	-237		2.31349	1.02142					0.71616	1.47328
11727	-236		1.59129	0.756784					0.47744	1.2
11726	-235		0.71847	0.471078					0.25664	0.59904
11725	-234		0.661606	0.582084					0.29472	0.59264
11724	-233		0.64011	0.629799					0.3392	0.61376
11723	-232		1.25996	0.619126					0.39232	0.84672
11722	-231		0.616202	0.407494					0.24384	0.41696
11721	-230		0.543994	0.423334					0.24384	0.40832
11720	-229		0.807466	0.561317					0.41152	0.53984
11719	-228		0.533315	0.492201					0.27808	0.55456
11718	-227		0.323198	0.3149					0.26432	0.44224
11717	-226		0.371985	0.344047					0.25024	0.24544
11716	-225		0.41449	0.328297					0.23872	0.37248
11715	-224		0.571943	0.407748					0.44192	0.47616
11714	-223		1.2202	0.732906					0.46848	0.90816
11713	-222		1.60842	0.809849					0.4864	0.9696
11712	-221		0.676825	0.571601					0.23616	0.38112
11711	-220		0.483372	0.336063					0.37984	0.3344
11710	-219		0.656565	0.523934					0.37088	0.56064
11709	-218		1.40349	0.865269					0.57792	0.98432
11708	-217		1.13184	0.666804					0.4256	0.57152
11707	-216		1.15655	0.759365					0.56256	0.78304
11706	-215		1.71417	1.11679					0.84064	0.99904
11705	-214		1.17554	0.584742					0.36704	0.6288
11704	-213		0.801083	0.614023					0.41536	0.616
11703	-212		0.630406	0.468388						0.51232
11702	-211		0.862242	0.701302					0.23872	0.51456
11701	-210		1.40927	1.11974					0.42048	0.80032
11700	-209		0.920549	0.669491					0.53984	0.59264
11699	-208		1.25393	0.772912					0.52064
11698	-207		1.3531	0.807303					0.50784	0.7472
11697	-206		0.940828	0.759837					0.56416	0.62624
11696	-205		0.879638	0.661933					0.41216	0.46048
11695	-204		0.620197	0.497735					0.47936	0.41824
11694	-203		0.870515	0.736022					0.56864	0.584
11693	-202		1.20482	0.924014					0.63584	0.861766
11692	-201		0.788205	0.521366					0.39776	0.67712
11691	-200		0.664223	0.434189					0.29216	0.5216
11690	-199		0.889329	0.627116					0.69216	0.7248
11689	-198		0.942319	0.777996					0.87008	0.83488
11688	-197		1.37453	1.00039					0.8752	0.80608
11687	-196		1.52029	1.0901					0.86624	1.16
11686	-195		1.47579	1.032					0.8688	0.90752
11685	-194		0.82237	0.523876					0.5104
11684	-193		1.13989	0.825654						0.71616
11683	-192		1.30381	0.857252						0.85504
11682	-191		0.885693	0.592691					0.54752	0.46048
11681	-190		1.39561	0.793752					0.58688	0.68768
11680	-189		0.675683	0.603251					0.34048	0.60768
11679	-188		1.28829	0.931335					0.49632	0.71104
11678	-187		0.79744	0.587376					0.3888	0.5248
11677	-186		1.14209	0.926059					0.68576	0.87904
11676	-185		1.03298	0.809627					0.66304	0.53152
11675	-184		1.09	0.777949					0.64288	0.6688
11674	-183		0.912175	0.672043					0.61216	0.51968
11673	-182		0.566763	0.72496					0.45216	0.3808
11672	-181		1.42573	0.756728					0.43584	0.83808
11671	-180		1.24915	1.00014					0.76704	0.735042
11670	-179		1.26809	0.76202					0.57664	0.86528
11669	-178		1.1311	0.873191					0.54336	0.63008
11668	-177		1.05963	0.719668					0.6576	0.60128
11667	-176		1.26745	0.767311					0.57024	0.77568
11666	-175		0.623068	0.613835					0.39904	0.51808
11665	-174		1.20556	0.873127					0.59328	0.62496
11664	-173		0.511324	0.412786					0.3088	0.45056
11663	-172		0.814238	0.629769					0.38336	0.39616
11662	-171		0.748402	0.582279					0.25152	0.32864
11661	-170		0.64276	0.510707					0.37472	0.56032
11660	-169		1.00063	0.915537					0.51808	0.59424
11659	-168		1.13604	1.01868					0.54368	0.928
11658	-167		0.752717	0.560968					0.32128	0.53024
11657	-166			0.367963					0.34048	0.42336
11656	-165			0.267255					0.32128	0.33856
11655	-164		0.313205	0.439276					0.59072
11654	-163		0.357981	0.468343					0.35168
11653	-162		1.14048	0.836128					0.34048
11652	-161		0.802223	0.642996					0.61856
11651	-160		0.621243	0.600618					0.49408
11650	-159		0.700752	0.770021					0.46464	0.53664
11649	-158		0.813309	0.762088					0.32384	0.83328
11648	-157		0.489874	0.547689						0.67232
11647	-156		0.766217	0.653533						0.54368
11646	-155		0.949831	0.754074					0.52064	0.48448
11645	-154		0.499401	0.45515					0.26016	0.52
11644	-153		1.43547	0.973683					0.8064	0.52832
11643	-152		0.996472	0.862622					0.6336	0.56736
11642	-151		1.37093	0.963085					0.4976	0.966722
11641	-150		1.11195	0.732897					0.58528	0.70432
11640	-149		0.860433	0.703793					0.4	0.78208
11639	-148		1.19929	0.664105					0.3632	0.87712
11638	-147		0.590108	0.661481					0.456	0.80576
11637	-146		0.522577	0.433934					0.30848	0.57056
11636	-145		0.934131	0.71175						0.689282
11635	-144		0.440085	0.407459						0.57728
11634	-143		0.613709	0.531827					0.46848	0.7584
11633	-142		0.598691	0.502709					0.34272	0.56544
11632	-141		1.15977	0.695865					0.3072	0.93312
11631	-140		0.943196	0.64295					0.20928	0.47584
11630	-139		0.64782	0.560918					0.21216	0.45536
11629	-138		1.44927	0.69321					0.54112	0.96
11628	-137		0.820679	0.526522					0.36704	0.54496
11627	-136		1.1816	0.712066					0.51296	0.87872
11626	-135		0.994758	0.587569					0.30848	0.54176
11625	-134		1.37043	0.814961					0.42784	0.9552
11624	-133		0.511954	0.5427					0.27424	0.6416
11623	-132		0.962536	0.677374					0.3328
11622	-131		0.745366	0.481556					0.32	0.43168
11621	-130		0.526036	0.547736						0.4944
11620	-129		0.756108	0.595314					0.27424	0.50944
11619	-128		0.946696	0.772596					0.25408	0.59968
11618	-127		1.03626	0.627086					0.25152	0.56896
11617	-126		1.53184	0.904911					0.54112	0.82304
11616	-125		1.24793	0.799051					0.52576	0.82976
11615	-124		0.871446	0.666761					0.32128	0.51968
11614	-123		1.18836	0.740835					0.66176	0.74528
11613	-122		0.616513	0.492126					0.18944	0.3216
11612	-121		1.12756	0.830793					0.41024	0.68736
11611	-120		1.80358	1.0901					0.67072	1.5072
11610	-119		1.90505	0.973669					0.50144	1.27008
11609	-118		2.08367	1.29117					0.58048	1.25472
11608	-117		1.17956	0.767293					0.296	0.80768
11607	-116		1.44372	0.709085					0.39744	0.904
11606	-115		1.35629	0.836102					0.46848	0.97856
11605	-114		1.1534	0.666751					0.5488	0.82112
11604	-113		1.72737	1.15889					0.75584	1.08352
11603	-112		1.45041	0.952517					0.59808	0.96032
11602	-111		1.42206	1.00542					0.58304	0.85856
11601	-110		1.102	0.677335					0.48	0.6976
11600	-109		2.00896	1.21198		0.349251			0.74816	1.46976
11599	-108		2.0088	1.06363		0.357188			0.83168	1.29696
11598	-107		1.61613	0.783186		0.484205			0.4864	1.05152
11597	-106		1.39038	0.836085		0.377053			0.4672	0.83808
11596	-105		1.76034	1.01606		0.412751			0.59424	1.1616
11595	-104		1.30984	0.94721		0.317501			0.6896	0.77056
11594	-103		1.71089	1.23826		0.502883			0.77728	0.94976
11593	-102		1.22509	0.904877		0.403545			0.45856	0.6368
11592	-101		0.765115	0.740835		0.456599			0.42016	0.64864
11591	-100		2.01728	1.29117		0.390317	0.984309		1.01088	1.3344
11590	-99		1.10001	0.867851		0.251442	0.762295		0.7264	0.94656
11589	-98		2.46862	1.18269		0.515939	1.12189		0.86624	1.38848
11588	-97		0.948591	0.703793		0.410318	0.550741		0.32256	0.82272
11587	-96		1.64797	1.01072		0.608543	0.846735		0.63264	1.13632
11586	-95		1.14765	0.822863		0.628526	0.434047		0.55904	0.70272
11585	-94		1.15269	0.740835		0.390317	0.444501		0.55648	0.69952
11584	-93		1.28732	0.963085		0.310956	0.666835		0.60704	0.8672
11583	-92		1.45338	0.963085		0.317776	0.687999		0.73408	1.0144
11582	-91		1.24983	1.05305		0.423334	0.899834		0.51328	1.02624
11581	-90		1.74762	1.36525		0.310956	1.09014		1.06176	1.24448
11580	-89		1.81628	1.10068		0.509324	1.07159		0.95008	1.18176
11579	-88		1.55197	1.05569		0.33073	1.13509		0.536	1.05664
11578	-87		1.39278	1.08215		0.449987	0.714421		0.66816	0.93984
11577	-86		1.27044	0.907523		0.430762	0.754231		0.48256	0.85344
11576	-85		1.16122	0.822856		0.456838	0.714421		0.64032	0.75008
11575	-84		1.81787	1.1774		0.383647	0.944564		0.66784	1.17856
11574	-83		1.66681	1.33879		0.555784	1.02394		0.912	1.20224
11573	-82		0.966701	1.08746		0.54937	0.849351		0.51584	0.78048
11572	-81		1.52871	1.2648		0.443227	1.07953		0.79776	1.1024
11571	-80		1.02997	0.905084		0.443178	0.82554		0.48288	0.721282
11570	-79		1.99286	1.42619		0.542397	1.11066		0.8512	1.26336
11569	-78		2.14378	1.29671		0.489659	1.08016		0.96768	1.52896
11568	-77		1.94357	1.06374		0.649444	0.958625		0.8	1.20736
11567	-76		1.90438	1.19595		0.416772	0.947274		0.80512	1.29696
11566	-75		1.22889	0.804335		0.582084	0.627725		0.60192	0.82976
11565	-74		1.60242	1.21179		0.343959	0.722314		0.6704	1.07712
11564	-73		1.55217	1.23296		0.483047	1.19597		0.7696	0.97696
11563	-72		1.63092	1.09009		0.398251	0.904957		0.72128	1.02432
11562	-71		1.76308	1.19063		0.622089	0.839392		1.01856	0.96352
11561	-70		2.50566	1.6616		0.568855	1.15696		1.11008	1.49024
11560	-69	0.667507	1.46039	0.910168		0.727726	1.02888		0.76448	0.99904
11559	-68	0.611189	2.01213	1.143		0.64165	0.920167		0.82272	1.25472
11558	-67	0.658814	1.44444	1.07422		0.502709	0.813604		0.64512	0.896
11557	-66	0.754732	2.22594	1.43938		0.469683	1.36188		0.97792	1.34112
11556	-65	0.456587	2.03034	1.3679		0.59535	1.25917		1.13792	1.09376
11555	-64	0.742962	2.38444	1.65101		0.635036	1.24659		1.16064	1.51392
11554	-63	0.693926	2.22465	1.45257		0.754064	1.11151		0.99296	1.40544
11553	-62	0.477054	1.74981	1.09009		0.833465	0.794386		0.72128	1.16
11552	-61	0.666108	1.93817	1.23296		0.56228	1.23848		0.92192	1.02464
11551	-60	0.658836	1.89799	1.42876		0.97905	1.26216		0.99552	1.14304
11550	-59	0.497521	1.79494	1.48432		0.661493	1.17478		0.9168	1.08704
11549	-58	0.65089	1.27045	1.19327		0.582122	0.722314		0.78496	0.87712
11548	-57	0.886387	2.43197	1.66424		0.826825	1.76215		1.34368	1.46112
11547	-56	0.66146	2.1503	1.70129		0.94591	1.69069		1.01376	1.35808
11546	-55	1.02933	2.41394	1.87855		0.899682	1.80189		1.31296	1.52576
11545	-54	0.828225	2.01704	1.58486		0.681336	1.13509		0.86592	1.12448
11544	-53	0.542444	2.21306	1.40494		0.774021	1.143		0.86592	1.19872
11543	-52	0.725123	2.00457	1.55047		0.694533	1.23828		1.02112	1.22784
11542	-51	0.698537	1.86637	1.38907		0.727606	1.36525		0.77216	1.16992
11541	-50	1.1166	2.53384	1.60603		0.826851	1.3494		1.28544	1.58304
11540	-49	1.4453	2.27678	1.63514		0.978983	1.50019		1.12288	1.68288
11539	-48	1.39309	2.57864	2.02672		1.02535	1.67471		1.35904	1.54752
11538	-47	0.976314	1.74503	1.61396		0.84008	1.2224		0.85088	0.97536
11537	-46	1.28598	2.28845	1.38907		0.820237	1.22238		0.83584	1.20576
11536	-45	1.33355	2.65125	1.75155		0.847082	1.27794		1.28288	1.44576
11535	-44	1.29004	2.38227	1.48696		0.635552	1.38927		0.97792	1.44544
11534	-43	2.10478	2.8465	1.89707		1.07175	1.8257		1.28032	1.84768
11533	-42	2.01226	3.14467	2.27015		1.02526	2.07445		1.59008	2.2048
11532	-41	2.31776	2.82469	1.85738		1.25693	1.80568		1.2752	1.95328
11531	-40	3.37753	3.40165	2.78343		1.41046	1.41817		1.54688	2.11072
11530	-39	2.47656	3.16579	1.74891		1.21727	1.42904		1.38688	1.83648
11529	-38	3.61952	3.29744	2.27542		1.22081	1.69353		1.25984	2.0144
11528	-37	3.92116	3.42473	2.15117		1.78887	1.15895		1.37664	1.7552
11527	-36	5.91346	3.18736	2.78342		1.95219	2.14842		1.78816	2.22528
11526	-35	3.78357	4.44166	2.23574		1.79562	2.33892		1.30304	2.09568
11525	-34	5.18584	4.20185	2.96074		1.82476	2.18274		1.4656	2.02176
11524	-33	4.96102	4.04164	2.64022		1.84745	2.67312		1.47808	1.69184
11523	-32	3.8497	3.83851	2.45534		2.11288	1.34996		0.88384	1.88704
11522	-31	5.24412	4.32818	3.26499		1.79318	1.6545		1.9328	2.29088
11521	-30	5.01125	4.23991	3.15385		2.60335	1.41947		1.392	1.97376
11520	-29	4.61438	3.99116	2.8099		1.61648	1.97474		1.40448	2.08608
11519	-28	5.79986	4.2208	3.09565		1.67969	1.85213		1.91264	2.44192
11518	-27	6.85814	4.42576	3.17236		1.99037	2.80983		1.9152	2.1744
11517	-26	2.98991	3.81102	2.31248		1.78558	1.1907		1.09728	1.60864
11516	-25	3.96876	4.02928	2.45009		1.91912	1.3759		1.23168	1.9408
11515	-24	6.69402	4.52298	2.94756		1.7678	1.95792		1.62336	1.96736
11514	-23	4.23671	3.93358	2.77284		1.36234	1.61402		1.60032	1.78112
11513	-22	5.04038	4.071	2.41303		1.79037	1.64149		1.16416	2.09312
11512	-21	3.47928	3.18562	2.37597		1.62533	0.817603		1.04672	1.59168
11511	-20	4.99091	3.96468	2.43682		1.87564	1.68011		1.32416	1.91008
11510	-19	5.12636	4.14809	2.84163		1.90088	1.91937		2.06912	2.21152
11509	-18	4.49805	3.64682	2.42888		1.5439	1.86832		1.57472	1.96448
11508	-17	3.53896	3.71813	2.73844		1.84703	1.24753		1.78816	2.16064
11507	-16	4.4319	4.58513	2.97128		1.92504	2.5643		1.96768	2.71296
11506	-15	3.00306	3.20504	2.14049		1.70786	1.08089		1.34784	2.0288
11505	-14	5.38435	4.38306	2.91572		1.76954	2.59638		1.76448	2.6688
11504	-13	3.88675	3.98373	2.51884		1.62602	1.61396		1.82912	2.28288
11503	-12	3.8947	3.28891	2.64849		1.468	2.57666		1.9168	2.09312
11502	-11	4.15001	3.95127	2.56911		1.62543	2.07058		1.77472	2.22848
11501	-10	2.97658	3.52385	2.56913		1.80082	1.44908		1.38176	2.36064
11500	-9	3.11562	3.2266	2.25161		1.28796	1.37415		1.37184	2.01824
11499	-8	3.59846	3.62226	2.35216		1.41651	1.81987		1.70336	2.18112
11498	-7	3.46877	4.07858	2.84164		1.39672	2.12365		2.01824	2.35392
11497	-6	2.90524	3.76986	1.99232		1.44926	2.023		1.66272	1.84896
11496	-5	2.65909	2.65551	1.83092		1.14207	1.35133		1.3616	1.50368
11495	-4	1.93682	2.73803	1.82564		1.29468	1.52519		0.94144	1.304
11494	-3	2.61144	2.81088	1.44992		1.45858	1.0268		1.31744	1.47648
11493	-2	2.15924	2.20178	1.62984		1.10478	1.15096		1.26336	1.5664
11492	-1	2.44475	3.41323	0.957794		1.65155	1.33616		1.2464	1.64256
11491	0	3.55633	3.25449	0.958688		1.88624	1.5809		1.27008	1.62784
11490	1	1.31772	10.5834	1.93675		2.3635	3.59573			4.17248
11489	2	1.30185	9.3681	3.63538		2.77967	3.63543			5.50656
11488	3	5.28639	15.9029	5.40809		3.58755	4.1993			6.07456
11487	4	3.5502	6.03274	8.21533		5.31978	7.04456			7.37664
11486	5	0.725053	14.2923	6.09204		3.9441	5.30628			8.35008
11485	6	0.940607		4.91465		3.37386	3.66714			5.67264
11484	7	1.06364				3.05666	4.13021			7.20704
11483	8	3.39425				4.28756	4.7295			6.68896
11482	9	2.25036				4.9763	7.28139			9.71554
11481	10	1.68674				1.97133	2.65252			5.34432
11480	11	2.71137				3.90584	4.55769			7.08033
11479	12	2.22847		5.89656		5.74756	4.53766			7.10147
11478	13	1.44531		6.6688		5.70332	5.76802			8.2976
11477	14	1.92557		6.18532		4.55115	5.45377			4.65664
11476	15	0.902911		7.34864		4.87014	5.18936			7.17536
11475	16	1.01877		6.00711		3.45305	2.88402			5.18592
11474	17	1.4226		5.38833		3.61196	3.21147			3.89472
11473	18	0.906292		4.9939		2.93795	3.02963			4.57696
11472	19	0.846722		4.82285		3.12346	3.7274			4.25184
11471	20	0.850165		4.1538		2.64746	3.53561			2.88032
11470	21	0.821984	10.2	3.54835		1.94631	2.74522			3.09376
11469	22		6.92159	3.21894		2.17023	2.91715			2.2656
11468	23		7.00638	3.2256		1.90574	2.48051			2.2352
11467	24		3.81682	4.11394		1.69354	1.46853			2.04704
11466	25		4.97925	2.61969		1.53601	1.48353			1.63296
11465	26		3.92804	2.73078		1.16537	1.99765			1.49856
11464	27		3.21569	3.40411		1.64063	2.63922			2.13344
11463	28		4.19114	2.58588		1.76028	1.68011			1.44032
11462	29		2.80437	2.73959		1.03188	2.17628			1.40704
11461	30		3.16675	2.49437		1.32299	1.53129			1.3968
11460	31		3.12934	2.89421		1.61418	2.08032			1.70432
11459	32		3.38452	2.76355		1.44198	2.07383			1.49856
11458	33		3.22126	2.61717		1.19246	2.05385			1.68416
11457	34		3.37249	2.70226		1.12263	1.49493			1.45056
11456	35		3.27624	2.72455		1.24996	2.34823			1.64864
11455	36		2.28848	2.61216		1.46112	2.37796			1.5392
11454	37		3.42485	3.09258		1.38678	2.28541			1.62048
11453	38		2.97606	2.31782		1.17594	1.99465			1.56448
11452	39		3.22527	2.52292		1.35483	2.00433			1.78048
11451	40		3.13796	2.64219		1.30175	1.94143			1.70432
11450	41		3.28342	2.52852		1.19709	2.46077			1.83136
11449	42		2.68272	2.22359		1.29186	1.36261			1.3056
11448	43		2.35645	2.2284		1.02664	1.36962			1.38176
11447	44		2.04188	1.81283		0.78324	1.03207			1.19904
11446	45		2.73814	2.23122		1.02664	1.38577			1.51648
11445	46		2.35638	2.58759		0.952561	1.98109			1.63552
11444	47		2.65729	1.94789		0.910415	1.05835			1.34624
11443	48		2.2584	2.2225		1.10067	1.34952			1.19136
11442	49		2.31698	1.86533		1.19592	0.886455			1.06688
11441	50		2.04567	1.50821		1.19611	0.608687			0.80032
11440	51		2.10466	2.30193		1.02664	1.11133			1.02368
11439	52		3.13275	2.29416		1.09091	1.14463			1.32576
11438	53		2.42375	1.99238		1.15363	0.813622			1.07424
11437	54		2.68926	2.04022		1.25942	1.10472			1.24704
11436	55		3.32997	2.49796		1.016	1.33615			1.4352
11435	56		2.33118	1.7051		1.24884	1.1245			1.12256
11434	57		2.63176	2.11714		0.984252	0.866537			1.28512
11433	58		1.7914	1.62714		0.814918	0.727636			0.96
11432	59		2.592	1.94111		1.01606	1.16434			1.2496
11431	60		2.58407	2.17079		1.19597	1.22377			1.392
11430	61		3.52221	2.59049		1.75684	1.79928			1.69184
11429	62		2.36992	1.94091		1.10072	0.767407			0.94752
11428	63		2.46861	2.16216		0.920752	0.568894			1.06656
11427	64		2.6355	2.31928		1.47112	1.34939			1.31584
11426	65		2.34267	1.9561		1.19597	1.13112			1.21664
11425	66		2.16774	1.93032		1.05834	0.866613			1.06944
11424	67		2.24381	2.18136		1.52433	1.58756			1.30048
11423	68		2.54009	2.27823		0.994835	1.26339			1.32352
11422	69		2.15911	2.04244		1.02664	0.906224			1.15328
11421	70		1.96862	1.72179		0.931395	1.23031			0.98016
11420	71		1.95843	2.02692		1.12184	1.11723			1.17856
11419	72		2.41792	2.1053		1.1748	1.04511			1.23456
11418	73		1.98794	2.24262		1.07955	1.11722			1.128
11417	74		1.85487	2.15885		1.14305	1.08352			0.90944
11416	75		2.34161	2.80984		1.13242	1.47396			1.29312
11415	76		2.34918	1.83825		1.07955	1.46518			1.40192
11414	77		2.30379	2.2263		1.30192	1.36599			0.96512
11413	78		2.88074	2.21767		1.24888	1.85369			1.2624
11412	79		2.01319	1.64489		0.814987	0.6352			1.25472
11411	80		1.90209	1.77498		0.984309	0.886381			0.84352
11410	81		2.5658	1.95511		0.78324	1.12984			1.01856
11409	82		2.04117	1.66521		0.974186	0.791159			1.0336
11408	83		2.62213	1.82845		1.29121	1.04913			0.82304
11407	84		2.6474	1.72823		1.36922	1.56767			1.14528
11406	85		2.00681	1.47108		0.76755	1.52422
11405	86		2.62544	1.78008		1.08512	1.74496
11404	87		2.98537	2.37876		1.16434	2.4846			1.41472
11403	88		2.87175	2.12172		0.80135	0.662808			0.81536
11402	89		2.97307	1.52783		1.05836	1.12724			0.8128
11401	90		2.15464	1.72776		1.17095	0.936661			1.0592
11400	91		2.31992	1.79146		1.16417	1.12713			0.82048
11399	92		2.108	1.2218		0.760794	0.778039
11398	93		2.49286	2.21863		1.02526	1.15097			1.00064
11397	94		2.13104	1.80576		0.860305	1.27003			0.81536
11396	95		2.52962	1.99252		1.29648	0.508063			1.16576
11395	96		2.58243	1.64474		0.879841	0.8811			0.98048
11394	97		1.79967	1.45468		0.73425	0.952502			0.67296
11393	98		1.6087	1.37241		0.701178	0.738189			0.79008
11392	99			1.9122		0.952525	1.34938			1.33856
11391	100			2.16656		1.17086	1.46846			1.02368
11390	101			1.62792		1.03868	1.37319			1.00064
11389	102			1.91395		0.972368	0.885069			1.25728
11388	103		2.52433	2.25537		1.21387	1.1002			1.02592
11387	104		1.50821	1.02234		0.56362	0.893564			0.57664
11386	105		2.73496	2.35005		1.03191	0.869247			1.06432
11385	106		2.14821	1.68716		0.986994	1.3613			1.10496
11384	107		2.87528	1.80797		0.966093	1.68279			1.3184
11383	108		2.48106	1.92734		1.09143	1.51608			1.07936
11382	109		2.11933	1.70109		0.926894	1.14046			0.84832
11381	110		2.35487	1.67692		1.13158	0.843447			1.23456
11380	111		2.39413	1.75161		0.707762	0.949969			1.38176
11379	112		1.48293	1.70495		0.701272	0.688045			0.64512
11378	113		2.30316	2.09778		0.947366	1.18738			1.10752
11377	114		2.22022	1.65982		0.715478	1.33225			1.1024
11376	115		2.12877	1.86557		0.820876	0.723646			1.08448
11375	116		1.77547	1.84884		1.1365	1.25415			1.28544
11374	117		2.25783	1.87556		0.954616	1.29384			1.24704
11373	118		2.19282	2.05768		1.08033	1.05178			1.20672
11372	119		2.14491	1.53303		0.788531	0.948601			0.93952
11371	120		1.10056	0.687663		0.549171	0.773908			0.54368
11370	121		1.55308	1.04479		0.502709	1.30578			0.69344
11369	122		1.80189	1.27505		0.827777	1.75026			0.66528
11368	123		1.83374	1.36945		0.694659	0.841895			0.65024
11367	124		2.03644	1.43428		0.76755	0.496139			0.82304
11366	125		2.00852	1.35279		0.715478	0.559014			0.81792
11365	126		2.15129	1.57612		0.841414	0.664844			1.0288
11364	127		2.39343	2.00561		1.36562	0.856616			0.81024
11363	128		2.10382	1.6075		0.762374	1.8588			0.8128
11362	129		2.67625	1.99834		1.24955	1.20393			1.66112
11361	130		2.23985	1.95109		0.965074	0.830251			1.08192
11360	131		1.70105	1.52556		0.868093	1.52805			0.93216
11359	132		2.14463	1.93448		0.878482	0.909568			1.12544
11358	133		1.8252	1.78681		0.825773	0.91981			0.878724
11357	134		2.12187	1.7198		0.720912	0.912814			1.0464
11356	135		1.99684	2.01924		0.508442	0.74759			1.04384
11355	136		2.12228	1.94322		1.10113	0.740848			1.28
11354	137		2.64564	1.95075		1.06897	1.33622			1.6256
11353	138		2.22064	1.93117		1.1432	0.730929			1.24448
11352	139		2.02866	1.81059		0.857513	0.800476			1.06176
11351	140		1.83574	1.81075		1.02664	0.939366			1.34624
11350	141		1.85189	1.67295		0.740835	1.81931			1.05408
11349	142			1.75594		0.995342	1.05174			1.30048
11348	143			1.49513		0.624418	1.30314			0.90432
11347	144		1.91335	1.60242		0.637202	1.04511			0.95008
11346	145		1.60356	1.43805		0.762295	1.21063			1.1072
11345	146		2.12004	1.72		0.615293	0.926421			1.1328
11344	147		1.7953	1.60314		0.973669	1.08487			0.95744
11343	148		1.85955	1.48334		0.603344	0.535782			0.9168
11342	149		1.73725	1.3998		0.974588	0.904912			0.81024
11341	150		2.26047	1.82576		0.741515	0.571556			0.97024
11340	151		1.31542	1.12144		0.571599	0.896939			0.72896
11339	152		2.17299	1.82207		0.719668	0.603251			0.96512
11338	153		1.87206	1.4201		0.734	0.825502			1.04672
11337	154		2.16287	2.01668		1.03765	0.738189			1.23168
11336	155		2.22924	1.77689		1.00592	0.762043			1.14816
11335	156		2.15568	1.84176		0.732166	0.928825			1.00352
11334	157		2.25532	1.7555		0.921725	0.539984			1.09472
11333	158		2.13529	1.31		0.730251	0.595367			1.01088
11332	159		1.62273	1.42362		0.721611	0.889002			0.8432
11331	160		1.79634	1.33138		0.582181	0.722488			0.81536
11330	161		1.98607	1.53016		0.529274	0.428699			0.95232
11329	162		1.56149	1.28157		0.772875	0.825502			0.77472
11328	163		1.70486	1.20478		0.645932	0.722488			0.71104
11327	164		1.44798	1.20243		0.497868	1.19859			0.63264
11326	165		1.82433	1.3017		0.81259	0.523876			0.6576
11325	166		1.66866	1.39129		0.635141	0.659005			0.72384
11324	167		1.62091	1.30463		0.580787	0.889002			0.78976
11323	168		1.6145	1.44556		0.661938	1.05569			0.72128
11322	169		1.57794	1.27988		0.607741	1.3335			0.856
11321	170		2.14879	1.43456		0.836489	1.70677			0.85856
11320	171		1.84351	1.37057	1.93817	0.838796	0.568894			0.80032
11319	172		1.466	1.35548	1.76923	0.562718	0.926067			0.64512
11318	173		1.95456	1.53648	1.53754	0.449793	0.73422			0.9856
11317	174		1.9413	1.56162	1.06118	1.64063	0.648365			0.9552
11316	175		2.44608	1.92419	1.55312	0.740835	0.509367			1.34624
11315	176		2.07383	1.80267	1.60397	0.889065	0.806396			1.51904
11314	177		1.99456	1.80292	2.29464	0.751716	0.5775			1.0752
11313	178		1.87384	1.69039	1.97893	0.624508	0.633274			1.38176
11312	179		1.88468	1.7801	1.05124	0.793822	0.627742			1.09248
11311	180		2.23002	1.82269	1.97249	0.423334	1.04781			1.44128
11310	181		1.51417	1.14513	2.05718	0.677335	0.615838			0.89728
11309	182		2.24886	1.43997	2.16517	0.624508	0.872465			1.4512
11308	183		1.70593	1.05205	1.56051	0.550436	0.780535			1.03296
11307	184		1.62241	1.05955	1.91657	0.74091	0.672744			1.0144
11306	185		1.96945	1.64168	2.28223	0.762295	0.867906			1.00416
11305	186		2.18039	1.78216	2.12994	0.508442	1.50675			1.5072
11304	187		1.82129	1.62465	1.34759	0.509871	1.1543			1.1008
11303	188		1.21697	1.07843	1.5174	0.78468	0.701204			0.57056
11302	189		1.32942	1.21641	1.3169		0.689241			0.8704
11301	190		1.6685	1.29384	1.387		0.809677			1.15328
11300	191		1.31693	1.05889	2.29003		0.777236			0.79072
11299	192		1.57767	1.23929	1.57479		0.558982			0.83808
11298	193		1.65029	1.8508	2.87488		1.14245			0.93472
11297	194		1.64045	0.986653	2.10241		0.878507
11296	195		1.36527	1.13735	0.843277		0.84207			0.88576
11295	196		1.57164	1.2453	1.47652		0.841408			0.95008
11294	197		1.77273	1.42177	1.24845		0.694533			1.26496
11293	198		1.98479	1.88517	1.80719		0.703876			1.02976
11292	199		1.7251	1.22544	3.07864		0.799445			0.88384
11291	200		2.09048	1.72678	2.11878		0.961867			0.896
11290	201		2.29142	2.0346	1.89623		1.05305			1.16512
11289	202		1.64571	1.2925	2.16796		1.00544			0.85504
11288	203		1.39181	1.14695	1.43632		0.80052			0.64512
11287	204		1.79958	1.53632	2.20891		0.694565			0.85024
11286	205		1.4536	1.18837	1.92344		1.42881			1.0192
11285	206		1.50291	1.07167	1.21861		0.972368			0.85152
11284	207		1.5315	1.29846	1.36148		0.773936			0.86368
11283	208		1.64051	1.42725	1.72563		0.674689			1.22912
11282	209		1.82051	1.6631	1.40412		0.542437			1.24608
11281	210		1.70798	1.39398	0.966177		0.687918			0.672323
11280	211		1.59836	1.37995	1.51329		1.0319			0.94656
11279	212		1.60168	1.27332	1.47122		1.0518			0.80416
11278	213		1.47831	1.06123	2.50846		1.55443			0.71456
11277	214		1.5915	1.36781	1.85081		1.60739			0.9296
11276	215		1.83458	1.83182	1.45591		0.710433			1.05312
11275	216		1.98976	1.43656	2.78147		0.736882			1.1344
11274	217		1.88778	1.5825	2.59894		0.705132			1.20736
11273	218		1.93695	1.73677	2.45877		0.943944			1.07008
11272	219		1.46446	0.82701	3.02028		0.820246			0.79424
11271	220		1.61517	1.3463	2.37763		0.672722			1.00096
11270	221		2.04265	2.17259	1.93917		0.719693			1.00928
11269	222		1.65633	1.55136	3.01847		0.82817			1.15488
11268	223		1.43934	1.38896	1.51127		0.639659			1.01088
11267	224		1.49778	1.21742	1.58139		0.507429			0.98048
11266	225		1.66689	1.19233	1.6981		0.92943			1.14464
11265	226		1.57166	0.767512	0.777067		0.999877			1.05664
11264	227		2.04805	2.04504	2.11937		0.604005			1.03264
11263	228		1.90512	1.42845	2.36001		0.88843			0.95168
11262	229		2.28072	1.37327	1.13788		1.00024			0.9568
11261	230		1.83125	2.0244	1.44707		1.6253			0.61312
11260	231		1.36926	1.07566	2.21233		0.754749			1.00768
11259	232		1.33353	1.01392	1.60736		1.15695			0.93472
11258	233		1.28441	1.16892	0.968988		0.971743			0.78048
11257	234		2.08507	1.43371	1.22698		0.774712			1.11776
11256	235		1.9726	1.69438	1.55547		0.886368			0.927041
11255	236		1.57743	1.21645	2.045		0.827494			0.64768
11254	237		1.63381	1.32406	1.56431		1.32307			0.76224		1.53792
11253	238		1.64776	1.39499	1.12914		1.29652			0.93344		1.44064
11252	239		1.43229	1.30148	1.60024		1.18209			0.73408		1.21408
11251	240		1.30889	1.01889	2.56979		0.851307			0.83712		1.5056
11250	241		1.69718	1.11914	2.80519		0.597328			0.9312		1.69312
11249	242		1.84537	1.43002	2.20893		1.01072			0.63776		1.6736
11248	243		1.30199	1.17578	1.67299		2.04532			0.60064		1.59296
11247	244		1.99026	1.42592	1.99431		0.789806			0.57024		1.67072
11246	245		1.54588	1.26775	1.96713		1.41035			0.77984		1.03296
11245	246		2.04284	1.57748	2.04391		0.994875			1.23264		1.58624
11244	247		1.59282	1.53305	1.82869		0.931335			1.03968		1.68352
11243	248		2.06928	1.73225			0.82021			1.0176		1.6544
11242	249		1.66245	1.6379			1.1113			0.85664		2.13664
11241	250		1.56137	1.49548	0.748192		0.873127			1.00064		1.56992
11240	251		1.79402	1.25605	2.45098		0.994835			0.91264		1.06848
11239	252		1.96334	1.55107	2.17511		1.41289			0.9872		2.224
11238	253		2.32856	1.7013	2.39714		0.780522			1.39712		1.86464
11237	254		2.20135	1.92543	2.43683		0.91546			0.88896		2.2112
11236	255		2.09042	1.58689	1.46846		0.981402			1.18848		2.03648
11235	256		1.2444	1.3127	1.92114		0.905016			0.71808		1.28512
11234	257		1.76228	1.32715	2.45005		1.1432			0.784		1.21088
11233	258		1.9529	1.3913	1.237		1.29118			0.87712		1.92
11232	259		1.97912	2.14174	1.49757		0.994892			1.02112		1.35008
11231	260		1.50293	1.08758	1.9811		1.73567			0.69952		2.36352
11230	261		2.00588	1.96897	2.10476		0.926071			1.27328		1.6544
11229	262		1.7309	1.08512	2.08636		1.38642			0.84512		1.5344
11228	263		1.7362	1.22997	2.36803		0.984283			0.80768		1.62528
11227	264		1.62651	1.14139	1.60736		1.43407			0.80928		1.84864
11226	265		2.06384	1.58923	1.60075		0.899616			0.95648		1.61888
11225	266		2.03568	1.82029	2.05714		1.04522			0.8416		1.76448
11224	267		2.16434	1.39947	2.05183		0.841565			0.73824		1.41792
11223	268		1.64756	1.28398	2.11833		0.785824			1.01952		1.12352
11222	269		1.12189	0.730016	2.19529		0.870513			0.91776		1.6704
11221	270		1.80641	1.16317	1.81442		0.807146			1.11936		1.68992
11220	271		2.44918	1.80933	2.21794		0.77791			0.96032		1.936
11219	272		2.27807	1.96911	2.49139		1.07422			1.08704		1.50528
11218	273		1.94525	1.80515	1.72321		0.849648			1.01952		1.84864
11217	274		2.06918	1.47012	2.14394		1.97646			1.13632		1.82592
11216	275		2.3826	1.29139	2.1361		1.44472			1.2176		2.69664
11215	276		1.99685	1.76352	2.73851		1.29391			0.83328		1.49248
11214	277		2.20851	1.73865	1.41628		1.07953			0.83136		1.6512
11213	278		1.87913	2.04564	1.46238		1.032			0.84832		1.28224
11212	279		1.76223	1.60508	2.32855		0.826801			1.02944		1.81312
11211	280		1.75694	1.88035	2.06378		1.35083			0.61312		1.34048
11210	281		1.84865	1.67507	2.21937		1.56379			0.64832		1.54432
11209	282		1.97036	1.4001	1.50485		1.274			0.52992		1.70944
11208	283		1.87594	1.2965	2.65261		1.1192			0.41632		1.33376
11207	284		1.62723	1.2965	2.49371		0.968586			0.60096		1.41152
11206	285		1.72594	1.66166	2.47717		1.98452			0.6992		1.50848
11205	286		1.62634	1.33354	2.01414		1.93677			0.6992		1.9456
11204	287		1.85134	1.18006	2.83779		1.34943			0.94656		1.53472
11203	288		1.56281	1.46595	3.26369		2.49244			0.82144		1.98144
11202	289		2.08852	1.53202	2.17971		1.5916			1.22432		1.46656
11201	290		1.76008	1.09538	2.04135		1.17875			0.96192		1.01664
11200	291		1.29137	1.00025	1.89584		0.833457			0.96352		1.28864
11199	292		1.6548	1.05768	1.4883		0.789823			0.68896		1.7904
11198	293		1.79607	1.10002	2.30543		1.08181			0.7008		2.2304
11197	294		1.14867	0.700506	1.36594		0.697871			0.81952		1.2432
11196	295		2.07966	1.5174	2.04193		0.992387					2.0784
11195	296		1.84868	1.94536	2.14451		1.63728					1.63488
11194	297		1.83804	1.31304	2.39385		1.25379			0.73152		1.71904
11193	298		2.08504	1.62124	2.32174		1.16756			1.016		1.45024
11192	299		2.26484	1.9421	2.04269		1.23033			0.98912		2.02336
11191	300		2.29682	2.03267	1.84166		0.853386			0.9616		2.208
11190	301		2.64134	2.34951	2.61939		1.89179			0.61824		1.95872
11189	302		1.8428	1.56104	2.16696		0.793779			0.99392		1.46656
11188	303		2.11835	1.64307	2.08758		1.0319			0.85696		1.46656
11187	304		2.38031	2.01348	1.84157		1.44222			0.7504		1.952
11186	305		2.24661	1.92645	2.28606		1.32955			0.56544		1.83904
11185	306		2.3315	1.68028	2.05583		1.72645			0.6128		1.76128
11184	307		2.26395	2.30191	2.71463		1.09155			0.76544		1.82272
11183	308		2.12482	2.12197	1.49267		1.79389			0.94336		1.95552
11182	309		1.93772	1.68805	1.50116		1.35339			1.22752		1.50528
11181	310		1.44376	1.32557	1.06152		1.09949			0.9312		1.21728
11180	311		1.41942	1.143	2.38913		0.718431			1.27872		1.56352
11179	312		1.74663	1.26736	1.34058		0.956504			0.9584		1.42784
11178	313		1.34799	1.12184	2.31362		0.976347			1.25792		1.22688
11177	314		2.33219	1.51342	2.23728		1.15888			0.78912		1.50208
11176	315		2.52603	1.98702	2.10943		0.797761			1.06656		2.12704
11175	316		2.10011	1.58758	2.11221		1.26407			0.88704		1.77088
11174	317		1.88388	1.62458	2.30042		0.464573			0.70944		1.26592
11173	318		2.56482	1.43969	2.84966		1.13509			0.53504		2.04288
11172	319		1.16911	1.01106	2.84124		0.928825			0.57728		1.41792
11171	320		2.31251	1.51084	1.85769		1.66427			0.5792		1.46976
11170	321		1.39718	1.01609	1.85614		1.30647			0.52672		1.32416
11169	322		2.47673	1.56685	2.10997		1.04249			0.58912		1.31744
11168	323		2.06382	1.83456	2.66968		0.547165			0.75872		1.55744
11167	324		1.81053	1.5303	2.21929		1.00676			0.86208
11166	325		2.25342	1.73325	2.3472		1.39768			1.87744
11165	326		1.64056	1.32583	3.2278		1.11989			1.03104
11164	327		2.0427	1.64849	2.50365		1.39635			0.85088
11163	328		2.03211	2.0006	1.42721		1.12913			0.42528
11162	329		2.48745	1.88691	1.93201		1.32362			0.87008
11161	330		1.91605	1.82875	2.05643		1.18007			0.76192
11160	331		1.85196	1.27265	1.64365		1.15895			0.92096
11159	332		1.49756	1.27539	1.76347		1.0782			0.91424
11158	333		1.87333	1.5532	2.67198		0.793779			0.87648
11157	334		1.86267	1.79137	2.058		1.66032			1.17056
11156	335		1.43426	1.29138	1.87245		1.11787			1.17664
11155	336		2.26022	1.74363	2.70745		1.42881			0.63072
11154	337		1.79997	1.38655	1.42725		0.859923			0.68992
11153	338		2.07451	1.9316	2.11981		1.66026			0.80832
11152	339		2.03215	1.2175	1.685		1.33615			0.84864
11151	340		2.20663	1.85759	1.9646		1.01203			0.89536
11150	341		2.1645	1.73587	2.08819		1.13773			0.9568
11149	342		2.03743	1.31251	2.14297		0.588699			0.94624
11148	343		1.68284	1.12464	2.34327		0.965754			0.75584
11147	344		2.25425	1.76277	1.48128		1.25435			0.76
11146	345		2.39736	1.75687	2.07324		1.2859			0.65632
11145	346		2.17498	1.73196	1.7712		0.912849			0.63296
11144	347		1.99616	1.59935	2.20429		1.23835			0.60544
11143	348		2.01152	1.47672	2.03146		1.51609			0.5376
11142	349		2.19075	1.94745	1.90738		1.37356			0.84224
11141	350		1.66189	1.51387	1.61695		1.20715			0.83616
11140	351		2.20144	1.71249	2.14902		0.809666			0.40832
11139	352		1.58764	1.06093	2.08896		0.857288			0.78304
11138	353		1.53459	1.38218	1.81391		1.02397			0.76192
11137	354		2.61428	2.21445	2.351		0.674689			0.64576
11136	355		1.87373	1.67659	2.50562		0.896974			1.13664
11135	356		2.34953	1.64418	1.71619		0.531814			0.46976
11134	357		1.93678	1.36756	2.51395		0.82554			0.72832
11133	358		2.65695	1.84789	2.27732		0.928723			0.51008
11132	359		2.69876	1.64234	1.78611		1.23034			1.22976
11131	360		2.11038	1.51523	1.78217		0.928723			0.68384
11130	361		1.24902	0.871955	2.47687		1.72246			0.67104
11129	362		1.94474	1.32803	1.48394		0.8811			0.82752
11128	363		1.58753	0.924636	2.27686		0.627265			0.6224
11127	364		2.42879	1.34912	1.59513		0.738232			0.3344
11126	365		2.09712	1.41284	1.36721		1.32559			0.44672
11125	366		1.75193	1.37877	2.49726					0.544
11124	367		0.935304	0.736437	1.80858					0.57152
11123	368		1.58117	1.07609	1.78345					0.30912
11122	369		1.95829	0.785738	2.11477					0.43392
11121	370		2.3928	1.84485	2.75322					0.43392
11120	371		1.29014	0.701382	2.18214					0.6688
11119	372		1.04519	1.0388	1.44594					0.70304
11118	373		1.06533	0.905867	1.53082					0.50784
11117	374		1.3163	1.06131	1.45612					0.61376
11116	375		1.78597	1.23962	1.76034					0.70496
11115	376		1.79961	1.61543	2.25406					0.36608
11114	377		1.93219	1.42567	2.21417					0.68384
11113	378		1.79917	1.37466	1.94442					0.81888
11112	379		1.46844	0.993437	1.55764					0.48896
11111	380		1.75993	0.88816	1.94445					0.62432
11110	381		2.43547	1.34428	2.42699					0.66048
11109	382		1.86607	1.21921	2.12982					0.688
11108	383		1.23721	1.70316	2.16178					0.66048
11107	384		1.01873	0.606584	1.50556					0.85504
11106	385		1.79936	1.47352	1.92931					1.57696
11105	386		2.83182	2.34624	3.14434					0.33472
11104	387		1.86574	0.969519	1.99287					0.2752
11103	388		1.91823	1.02564	2.02421					0.7792
11102	389		1.98478	0.948154	2.48868					1.0224
11101	390		2.44148	1.53243	2.71041					1.09216
11100	391		2.3748	1.49197	2.63117					0.52256
11099	392		1.84559	1.40304	2.28247					0.83616
11098	393		3.39085	2.20504	2.89736					0.80256
11097	394		1.40997	0.943265	1.6037					0.65536
11096	395		1.57519	0.883727	1.9792
11095	396		1.24372	0.488222	1.67271
11094	397		1.60779	0.817564	1.63107
11093	398		1.24184	0.730251	1.90644
11092	399		1.86543	1.30104	2.3821
11091	400		2.13702	1.78065	2.39418
11090	401		2.44797	1.99512	2.39193
11089	402		1.21773	0.968507	2.3073
11088	403		1.91504	0.730251	1.7251
11087	404		1.16424	0.658814	1.53475
11086	405		1.50813	1.0081	2.01616
11085	406		2.27558	1.25415	2.10081
11084	407		1.79995	0.889321	1.52407
11083	408		1.50906	1.12724	1.9742
11082	409		1.37609	0.881386	2.01096
11081	410		2.50049	1.44498	2.01627
11080	411		1.7145	0.928723	1.61423
11079	412		3.16465	2.4316	2.86833
11078	413		1.58225	1.30136	1.9527
11077	414		2.56268	1.53335	2.60352
11076	415		2.00047	1.17645	2.31781
11075	416		2.78631	1.73682	3.04819
11074	417		2.87319	2.28408	2.83105
11073	418		1.6123	0.780697	1.66451
11072	419		1.90274	0.96974	1.93301
11071	420		1.56156	0.947872	1.76876
11070	421		2.59824	1.17433	2.16436
11069	422		1.49506	0.842827	1.65896
11068	423		1.23574	0.748125	1.91294
11067	424		1.87044	0.917852	2.01613
11066	425		0.778272	0.529168	1.33811
11065	426		1.57215	0.932658	1.97215
11064	427		2.02449	0.998826	1.92361
11063	428		1.97659	1.40364	2.27877
11062	429		0.969547	0.999154	1.93083
11061	430		1.98495	1.03849	1.84175
11060	431		1.5875	0.952525	2.4005
11059	432		2.03768	0.853283	2.02317
11058	433		2.20686	1.5772	2.22871
11057	434		1.82625	1.09677	2.40244
11056	435		2.06382	1.30176	1.72691
11055	436		2.37176	1.09121	2.66032
11054	437		1.60884	1.10072	1.5939
11053	438		2.25844	1.51607	1.76613
11052	439		1.26485	0.746202	1.50377
11051	440		2.52359	1.33882	2.12773
11050	441		1.55882	1.21445	1.68091
11049	442		2.2543	1.39702	1.7227
11048	443		2.51735	1.50287	1.50158
11047	444		2.22295	1.84163	1.58515
11046	445		1.68568	1.01879	1.88171
11045	446		2.72323	1.55318	2.77637
11044	447		2.15662	1.16948	1.71524
11043	448		2.26011	1.25151	1.82131
11042	449		1.95024	1.19338	1.65253
11041	450		2.32819	1.19067	1.55842
11040	451		1.42893	1.10871	1.22255
11039	452		2.56972	1.87593	2.09389
11038	453		1.88529	1.53097	2.02471
11037	454		1.03722	0.846668	1.31037
11036	455		1.20766	1.25217	1.21672
11035	456		1.00547	1.07234	1.98351
11034	457		0.994892	1.0061	1.81878
11033	458		2.14907	1.23843	1.23901
11032	459		1.67247	0.762002	1.40474
11031	460		1.45007	0.730941	1.29031
11030	461		1.21709	0.751418	1.19129
11029	462		1.32842	0.836085	1.6274
11028	463		1.1487	0.519016	1.63592
11027	464		1.8099	1.39736	1.63319
11026	465		1.5188		1.38303
11025	466		1.40311		1.35279
11024	467		1.55577		1.50595
11023	468		1.38714		1.82627
11022	469		1.91573		1.69604
11021	470		2.14864		1.64088
11020	471		1.97391		1.30487
11019	472		1.76221		1.54379
11018	473		2.01109		1.14915
11017	474		1.5823		0.906464
11016	475		1.05135		1.41233
11015	476		0.693891		1.90453
11014	477		1.26525		0.944864
11013	478		1.58239		0.762374
11012	479		1.87338		1.39416
11011	480		1.22788		1.79045
11010	481		1.11148		1.27248
11009	482		1.52967		2.09845
11008	483		1.64124		1.34207
11007	484		1.6034		1.9286
11006	485		1.49259		1.52685
11005	486		1.34475		1.52584
11004	487		1.29273		1.28202
11003	488		2.49769		1.68655
11002	489		1.62984		1.97013
11001	490		2.03225		1.26494
11000	491		0.698501		1.16393
10999	492		0.857513		1.51857
10998	493		1.31238		0.790824
10997	494				0.85366
10996	495				0.564532
10995	496				1.20419
10994	497				1.62174
10993	498				1.11993
10992	499				1.3108
10991	500				1.66296
10990	501				1.54393
10989	502				0.873144
10988	503				2.46068
10987	504				1.05386
10986	505				0.976665
10985	506				2.05192
10984	507				1.3097
10983	508				1.6828
10982	509				1.08354
10981	510				1.1708
10980	511				1.36923
10979	512				1.40897
10978	513				1.4209
10977	514				1.08747
10976	515				0.928689
10975	516				2.38925
10974	517				1.19137
10973	518				2.04808
10972	519				1.67862
10971	520				1.18034
10970	521				0.60438
10969	522				0.469617
10968	523				1.20894
10967	524				1.00206
10966	525				0.914511
10965	526				0.871297
10964	527				0.993542
10963	528				0.683508
10962	529				0.683518
10961	530				1.3903
10960	531				1.04236
10959	532				1.21706
10958	533				0.858559
10957	534				1.50233
10956	535				1.37604
10955	536				0.85073
10954	537				1.40496
10953	538				1.29391
10952	539				0.936761
10951	540				0.731141
10950	541				1.2654
10949	542				0.902544
10948	543				1.05089
10947	544				0.576939
10946	545				0.954975
10945	546				0.982601
10944	547				0.554569
10943	548				0.565084
10942	549				1.59109
10941	550				0.603885
10940	551				0.88251
10939	552				0.581564
10938	553				1.675
10937	554				0.679898
10936	555				0.753767
10935	556				1.32076
10934	557				1.30901
10933	558				1.10154
10932	559				0.779901
10931	560				1.00544
10930	561				0.948591
10929	562				0.845895
10928	563				1.22673
10927	564				0.564457
10926	565				0.686354
10925	566				1.13905
10924	567				1.49671
10923	568				0.754329
10922	569				0.528217
10921	570				0.828871
10920	571				1.00413
10919	572				1.29724
10918	573				0.914565
10917	574				0.972208
10916	575				0.601683
10915	576				0.5505
10914	577				0.838864
10913	578				0.512999
10912	579				0.496206
10911	580				0.450205
10910	581				0.579384
10909	582				0.712841
10908	583				0.608881
10907	584				0.603736
10906	585				0.65302
10905	586				0.749666
10904	587				0.924757
10903	588				1.03632
10902	589				1.0209
10901	590				0.478867
10900	591				1.1387
10899	592				1.16647
10898	593				0.956522
10897	594				0.581591
10896	595				0.977462
10895	596				0.705191
10894	597				0.686354
10893	598				0.503251
10892	599				0.304188
10891	600				0.527256
10890	601				0.670157
10889	602				0.969181
10888	603				0.722494
10887	604				0.378639
10886	605				0.473574
10885	606				0.713051
10884	607				0.728855
10883	608				1.04447
10882	609				0.894649
10881	610				0.456838
10880	611				0.390575
10879	612				0.970457
10878	613				0.595314
10877	614				0.61124
10876	615				0.702145
10875	616				0.318392
10874	617				0.325535
10873	618				0.214313
10872	619				0.373401
10871	620				0.90908
10870	621				0.540684
10869	622				0.412751
10868	623				0.905434
10867	624				0.953328
10866	625				0.511031
10865	626				0.795694
10864	627				0.765343
10863	628				0.925665
10862	629				0.663578
10861	630				0.706082
10860	631				0.477308
10859	632				0.510229
10858	633				0.62887
10857	634				0.350062
10856	635				0.637427
10855	636				0.943196
10854	637				0.676973
10853	638				0.939984
10852	639				0.454938
10851	640				0.439679
10850	641				0.50107
10849	642				0.469992

## Sheet: G47995
Breckenridge, A., et al., 2020, A new glacial varve chronology along the southern Laurentide Ice Sheet that spans the Younger Dryas–Holocene boundary: Geology, v. 49, https://doi.org/10.1130/G47995.1
